# Supplementary material for: Pivotal Evaluation of an Artificial Intelligence System for Autonomous Detection of Referrable and Vision-Threatening Diabetic Retinopathy
Source: PubMed Central journal article supplement — JAMA Netw Open. 2021 Nov 15;4(11):e2134254. doi: 10.1001/jamanetworkopen.2021.34254 (PMC8593763; doi:10.1001/jamanetworkopen.2021.34254), 2021-11-15
Supplement: jamanetwopen-e2134254-s002.pdf [file jamanetwopen-e2134254-s002.pdf]

\*Indicates required information. Only first name, last name, and suffix will appear in PubMed.

| <b>*Group Name(s): EyeArt study group</b> |                   |                              |                  |                                                                                                   |                                          |                                                         |                                                                                            |
|-------------------------------------------|-------------------|------------------------------|------------------|---------------------------------------------------------------------------------------------------|------------------------------------------|---------------------------------------------------------|--------------------------------------------------------------------------------------------|
| <b>*First Name and Middle Initial(s)</b>  | <b>*Last Name</b> | <b>*Suffix (eg, Jr, III)</b> | Academic Degrees | Institution                                                                                       | Location (city, state/province, country) | Role or Contribution, eg, chair, principal investigator | Group (if more than 1 Group listed in the byline) and/or Subgroup (eg, Steering Committee) |
| Harvey B.                                 | DuBiner           |                              | MD               | Eye Care Centers Management Company, Inc. (dba Clayton Eye Center)                                | Morrow, GA                               | Principal investigator                                  |                                                                                            |
| Pauline                                   | Genter            |                              | MS RD            | Los Angeles Biomedical Research Institute (now Lundquist Institute) at Harbor-UCLA Medical Center | Torrance, CA                             | Research coordinator                                    |                                                                                            |
| Joyce                                     | Graham            |                              |                  | Los Angeles Biomedical Research Institute (now Lundquist Institute) at Harbor-UCLA Medical Center | Torrance, CA                             | Research coordinator                                    |                                                                                            |
| Alan                                      | Johnson           |                              |                  | Los Angeles Biomedical Research Institute (now Lundquist Institute) at Harbor-UCLA Medical Center | Torrance, CA                             | Research coordinator                                    |                                                                                            |
| Grace                                     | Levy-Clarke       |                              | MD               | Tampa Bay Uveitis Center                                                                          | St. Petersburg, FL                       | Principal investigator                                  |                                                                                            |
| Richard D.                                | Pesavento         |                              | MD               | Retina Consultants of Southern California                                                         | Redlands, CA                             | Principal investigator                                  |                                                                                            |
| Mark D.                                   | Sherman           |                              | MD               | Pacific Eye Surgeons                                                                              | Lompoc, CA                               | Principal investigator                                  |                                                                                            |
| Brian T.                                  | Kim               |                              | MD               | Harvard Eye Associates                                                                            | Laguna Hills, CA                         | Principal investigator                                  |                                                                                            |
| Gerald B.                                 | Walman            |                              | MD               | Walman Eye Center/N Vision Eye Centers                                                            | Sun City, AZ                             | Principal investigator                                  |                                                                                            |
| Halis K.                                  | Akturk            |                              | MD               | Barbara Davis Center for Diabetes, University of Colorado Anschutz Medical Campus                 | Aurora, CO                               | Co-investigator                                         |                                                                                            |

## Supplemental Online Content: Nonauthor Collaborators

\*Indicates required information. Only first name, last name, and suffix will appear in PubMed.

| *First Name and Middle Initial(s) | *Last Name | *Suffix (eg, Jr, III) | Academic Degrees | Institution                                                                       | Location (city, state/province, country) | Role or Contribution, eg, chair, principal investigator | Group (if more than 1 Group listed in the byline) and/or Subgroup (eg, Steering Committee) |
|-----------------------------------|------------|-----------------------|------------------|-----------------------------------------------------------------------------------|------------------------------------------|---------------------------------------------------------|--------------------------------------------------------------------------------------------|
| Hal                               | Joseph     |                       |                  | Barbara Davis Center for Diabetes, University of Colorado Anschutz Medical Campus | Aurora, CO                               | Co-investigator                                         |                                                                                            |
| Prakriti                          | Joshee     |                       | BS               | Barbara Davis Center for Diabetes, University of Colorado Anschutz Medical Campus | Aurora, CO                               | Research coordinator                                    |                                                                                            |
| Bruce                             | Trippe     |                       | MD               | Endocrinology Associates of Montgomery, P.A.                                      | Montgomery, AL                           | Principal investigator                                  |                                                                                            |
| John M.                           | Gilbert    |                       | MD               | St. Joseph Heritage Healthcare                                                    | Fullerton, CA                            | Principal investigator                                  |                                                                                            |
| Barbara A.                        | Blodi      |                       | MD               | Wisconsin Fundus Photograph Reading Center, University of Wisconsin               | Madison, WI                              | Co-investigator                                         |                                                                                            |
| Susan                             | Reed       |                       | BS               | Wisconsin Fundus Photograph Reading Center, University of Wisconsin               | Madison, WI                              | Research Program Manager                                |                                                                                            |
| James                             | Reimers    |                       | BA               | Wisconsin Fundus Photograph Reading Center, University of Wisconsin               | Madison, WI                              | Senior Research Specialist                              |                                                                                            |
| Kris                              | Lang       |                       | BS               | Wisconsin Fundus Photograph Reading Center, University of Wisconsin               | Madison, WI                              | Senior Research Specialist                              |                                                                                            |
| Holly                             | Cohn       |                       | MFA              | Wisconsin Fundus Photograph Reading Center, University of Wisconsin               | Madison, WI                              | Senior Research Specialist                              |                                                                                            |
| Ruth                              | Shaw       |                       | BS               | Wisconsin Fundus Photograph Reading Center, University of Wisconsin               | Madison, WI                              | Senior Research Specialist                              |                                                                                            |

Supplemental Online Content: Nonauthor Collaborators

\*Indicates required information. Only first name, last name, and suffix will appear in PubMed.

| *First Name and Middle Initial(s) | *Last Name | *Suffix (eg, Jr, III) | Academic Degrees | Institution                                                         | Location (city, state/province, country) | Role or Contribution, eg, chair, principal investigator | Group (if more than 1 Group listed in the byline) and/or Subgroup (eg, Steering Committee) |
|-----------------------------------|------------|-----------------------|------------------|---------------------------------------------------------------------|------------------------------------------|---------------------------------------------------------|--------------------------------------------------------------------------------------------|
| Sheila                            | Watson     |                       | BS               | Wisconsin Fundus Photograph Reading Center, University of Wisconsin | Madison, WI                              | Senior Research Specialist                              |                                                                                            |
| Andrew                            | Ewen       |                       | BS               | Wisconsin Fundus Photograph Reading Center, University of Wisconsin | Madison, WI                              | Senior Research Specialist                              |                                                                                            |
| Nancy                             | Barrett    |                       |                  | Wisconsin Fundus Photograph Reading Center, University of Wisconsin | Madison, WI                              | Senior Research Specialist                              |                                                                                            |
| Maria                             | Swift      |                       |                  | Wisconsin Fundus Photograph Reading Center, University of Wisconsin | Madison, WI                              | Senior Research Specialist                              |                                                                                            |
| Jeffrey                           | Gornbein   |                       | DrPH             | University of California, Los Angeles                               | Los Angeles, CA                          | Statistical Consultant                                  |                                                                                            |
